# Supplementary material for: Insilico Functional Analysis of Genome-Wide Dataset From 17,000 Individuals Identifies Candidate Malaria Resistance Genes Enriched in Malaria Pathogenic Pathways
Source: Front Genet. 2021 Nov 18;12:676960. doi: 10.3389/fgene.2021.676960 (PMC8639191; doi:10.3389/fgene.2021.676960)
Supplement: Supplementary file 5 [file Table6.XLSX]

## Sheet: Sheet1
Supplementary data 5. Significant malaria resistance candidate genes identified by PASCAL analysis
Gene	chromosome	Strand	Cytoban	start	end	Biotype	N of SNPs	P-value
ABLIM2	chr4	-	p16.1	7967036	8160559	protein_coding	37	3.8e-09
ABO	chr9	-	q34.2	136130562	136150630	protein_coding	169	2.67e-11
ADAMTS16	chr5	+	p15.32	5140442	5320412	protein_coding	48	1.61e-07
ARHGAP18	chr6	-	q22.33	129898239	130182692	protein_coding	53	1e-08
ATP2B4	chr1	+	q32.1	203595914	203713209	protein_coding	106	4.68e-09
ATXN7L1	chr7	-	q22.3	105245220	105517031	protein_coding	80	3.4e-08
BACE2	chr21	+	q22.2	42539727	42648524	protein_coding	23	3.78e-07
CACNA1A	chr19	-	p13.13	13317255	13617274	protein_coding	41	2.55e-06
CAMK1D	chr10	+	p13	12391582	12871733	protein_coding	41	1.87e-06
CDH13	chr16	+	q23.3	82660398	83830215	protein_coding	245	4.19e-08
CLYBL	chr13	+	q32.3	100258918	100549388	protein_coding	16	5.83e-07
CNOT6	chr5	+	q35.3	179921416	180005353	protein_coding	33	3.23e-07
CNTN4	chr3	+	p26.3	2140549	3099645	protein_coding	114	3.88e-09
CNTN5	chr11	+	q22.1	98891705	100229616	protein_coding	240	1.28e-06
CNTNAP2	chr7	+	q35	145813452	148118088	protein_coding	158	6.1e-08
COL27A1	chr9	+	q32	116918230	117072975	protein_coding	32	2.72e-06
CPXM2	chr10	-	q26.13	125465725	125699779	protein_coding	17	2.69e-06
CRBN	chr3	-	p26.2	3191316	3221401	protein_coding	25	1.23e-07
CSMD1	chr8	-	p23.2	2792874	4852328	protein_coding	499	1.58e-12
CTIF	chr18	+	q21.1	46065426	46389586	protein_coding	22	1.71e-07
DAB1	chr1	-	p32.1	57463578	59012446	protein_coding	136	5.08e-07
DGKB	chr7	-	p21.2	14184673	14942550	protein_coding	52	3.87e-09
DIP2C	chr10	-	p15.3	320129	735608	protein_coding	104	4.54e-07
DLGAP1	chr18	-	p11.31	3496029	4455266	protein_coding	72	2.38e-10
ERICH1-AS1	chr8	+	p23.3	687586	1087777	protein_coding	64	2.04e-06
EVC	chr4	+	p16.2	5712923	5830772	protein_coding	16	7.56e-07
FHIT	chr3	-	p14.2	59735035	61237133	protein_coding	179	1.78e-09
FLT4	chr5	-	q35.3	180028505	180076624	protein_coding	25	9.96e-08
FRMD4A	chr10	-	p13	13685705	14504143	protein_coding	136	1.69e-07
FZD10	chr12	+	q24.33	130647003	130650285	protein_coding	18	1.26e-07
FZD10-AS1	chr12	-	q24.33	130636137	130646768	lncRNA	18	1.26e-07
GAS7	chr17	-	p13.1	9813925	10101868	protein_coding	19	1.63e-06
GLIS3	chr9	-	p24.2	3824127	4300035	protein_coding	25	1.5e-07
GPC5	chr13	+	q31.3	92050934	93519487	protein_coding	93	1.59e-06
HBB	chr11	-	p15.4	5246695	5248301	protein_coding	177	4.92e-10
HBBP1	chr11	-	p15.4	5263184	5264822	transcribed_unprocessed_pseudogene	108	2e-08
HBD	chr11	-	p15.4	5254058	5255858	protein_coding	150	8.79e-10
HBE1	chr11	-	p15.4	5289579	5526882	protein_coding	325	9.39e-11
HBG2	chr11	-	p15.4	5269501	5667011	protein_coding	478	1e-12
ICA1	chr7	-	p21.3	8152814	8302242	protein_coding	60	4.63e-07
IL2RA	chr10	-	p15.1	6052656	6104333	protein_coding	35	1.31e-06
KAZN	chr1	+	p36.21	14925212	15444544	protein_coding	44	2.15e-06
KCNIP1	chr5	+	q35.1	169780880	170163636	protein_coding	42	2.64e-06
KCNIP4	chr4	-	p15.2	20730238	21950374	protein_coding	157	2.31e-06
KCTD1	chr18	-	q11.2	24034873	24237365	protein_coding	17	3.25e-07
KIF26B	chr1	+	q44	245318286	245866428	protein_coding	151	2.23e-08
KIR3DX1	chr19	+	q13.42	55043908	55055195	transcribed_unprocessed_pseudogene	11	1.53e-06
LINC00260	chr1	+	q32.1	203699704	203700979	lncRNA	99	5.36e-09
LINC00856	chr10	+	q22.3	80008381	80311112	lncRNA	16	1.95e-06
LOC100134259	chr2	+		47055002	47086145	lncRNA	13	4.69e-07
LOC100507584	chr6	-		33857287	33864684	lncRNA	7	1.37e-06
LOC388948	chr2	+		47043806	47049799	lncRNA	12	7.44e-07
LPP	chr3	+	q27.3	187871662	188608460	protein_coding	83	5.61e-08
LRP1B	chr2	-	q22.2	140988995	142889270	protein_coding	266	9.36e-09
MAGI2	chr7	-	q21.11	77646373	79082890	protein_coding	52	1.04e-06
MED22	chr9	-	q34.2	136207754	136214972	protein_coding	42	5.65e-08
MEGF6	chr1	-	p36.32	3404505	3528059	protein_coding	45	6.37e-07
MIR5188	chr12	+	q24.31	125400092	125400205	miRNA	26	1.1e-06
MTHFD1L	chr6	+	q25.1	151186814	151423023	protein_coding	36	4.3e-08
MTUS2	chr13	+	q12.3	29598747	30080084	protein_coding	90	2.56e-06
MYO16	chr13	+	q33.3	109248499	109860355	protein_coding	32	9.38e-07
NALCN	chr13	-	q33.1	101706129	102068843	protein_coding	73	1.19e-06
NAV2	chr11	+	p15.1	19372270	20143147	protein_coding	49	2.84e-06
NKAIN2	chr6	+	q22.31	124125068	125146786	protein_coding	68	6.74e-09
NMT2	chr10	-	p13	15147770	15210695	protein_coding	59	2.57e-06
NPAS3	chr14	+	q13.1	33408458	34273382	protein_coding	56	3.34e-07
NTM	chr11	+	q25	131240370	132206716	protein_coding	105	5.67e-07
OBP2B	chr9	-	q34.2	136080665	136084628	protein_coding	112	1.37e-11
OPCML	chr11	-	q25	132284874	133402403	protein_coding	112	1.46e-07
OR51B2	chr11	-	p15.4	5344527	5345582	protein_coding	69	8.96e-08
OR51B4	chr11	-	p15.4	5322243	5323176	protein_coding	81	4.62e-10
OR51B5	chr11	-	p15.4	5362112	5526882	protein_coding	241	2.26e-07
OR51B6	chr11	+	p15.4	5372737	5373676	protein_coding	83	1.5e-07
OR51E2	chr11	-	p15.4	4701400	4719076	protein_coding	33	7.15e-07
OR51F1	chr11	-	p15.4	4790208	4791147	Pseudogene	119	8e-07
OR51F2	chr11	+	p15.4	4842615	4843644	protein_coding	118	1.99e-06
OR51T1	chr11	+	p15.4	4903048	4904113	protein_coding	37	1.9e-06
OR51V1	chr11	-	p15.4	5220964	5221930	protein_coding	189	4.38e-09
OR52B4	chr11	-	p15.4	4388492	4389616	protein_coding	133	1.56e-06
OR52K2	chr11	+	p15.4	4470524	4471591	protein_coding	129	2.61e-07
OR52R1	chr11	-		4824662	4825610		119	1.98e-06
OR56A1	chr11	-	p15.4	6047900	6048971	protein_coding	29	2.34e-06
PARK2	chr6	-		161768589	163148834		230	6.33e-08
PCSK5	chr9	+	q21.13	78505559	78977255	protein_coding	73	2.88e-11
PGAP2	chr11	+	p15.4	3818953	3847601	protein_coding	15	1.18e-06
PITPNC1	chr17	+	q24.2	65373396	65693379	protein_coding	28	2.2e-07
PLCB1	chr20	+	p12.3	8095099	8865547	protein_coding	147	2.36e-06
PRKAG2	chr7	-	q36.1	151253200	151574316	protein_coding	24	8.63e-07
PRKG1	chr10	+	q11.23	52750910	54058110	protein_coding	125	1.25e-06
PTPRD	chr9	-	p23	8314245	10612723	protein_coding	320	4.72e-07
PTPRN2	chr7	-	protein_coding	157331749	158380482		102	4.2e-08
PTPRS	chr19	-	q36.3	5158505	5340814	protein_coding	35	2.16e-07
PTPRT	chr20	-	q13.11	40701391	41818557	protein_coding	65	4.92e-07
RBCK1	chr20	+	p13	388708	411610	protein_coding	26	9.65e-07
RBFOX1	chr16	+		6069131	7763340		219	9.76e-11
RBFOX3	chr17	-	q25.3	77085426	77512230	protein_coding	34	9.5e-07
RBM17	chr10	+	p15.1	6130948	6159422	protein_coding	40	5.8e-07
RIMBP2	chr12	-	q24.33	130880680	131200826	protein_coding	78	3.33e-07
RORA	chr15	-	q22.2	60780482	61521502	protein_coding	63	2.28e-07
RPL7A	chr9	+	protein_coding	136215068	136218280		38	5.81e-08
RUNX1	chr21	-	q22.12	36160097	37357047	protein_coding	115	5.7e-07
RYR2	chr1	+	q43	237205701	237997288	protein_coding	115	1.74e-08
RYR3	chr15	+	q13.3	33603176	34158303	protein_coding	93	1.04e-07
SARDH	chr9	-	q34.2	136528683	136605077	protein_coding	8	2.69e-06
SCARB1	chr12	-	q24.31	125262173	125365007	protein_coding	33	9.95e-07
SCGB3A1	chr5	-	q35.3	180017104	180018487	protein_coding	24	1.46e-07
SLC35F3	chr1	+	q42.2	234040678	234460262	protein_coding	73	4.5e-08
SLIT3	chr5	-	q35.1	168088737	168728133	protein_coding	30	1.82e-07
SMYD3	chr1	-	q44	245912641	246670644	protein_coding	142	1.79e-06
SNORA77	chr1	+	q32.1	203698708	203698833	snoRNA	101	5.53e-09
SNORD24	chr9	+	q34.2	136216250	136216325	snoRNA	37	1.07e-07
SNORD36A	chr9	+	q34.2	136217310	136217382	snoRNA	37	1.17e-07
SNORD36B	chr9	+	q34.2	136216948	136217019	snoRNA	36	2.15e-07
SNORD36C	chr9	+	q34.2	136217700	136217767	snoRNA	37	1.17e-07
SORCS2	chr4	+	p16.1	7194373	7744564	protein_coding	111	5.3e-09
SSUH2	chr3	-	p25.3	8661085	8786726	protein_coding	41	3.92e-08
SURF1	chr9	-	q34.2	136218665	136223361	protein_coding	37	1.12e-07
SURF2	chr9	+	q34.2	136223420	136228040	protein_coding	34	1.74e-07
SURF4	chr9	-	q34.2	136228339	136242970	protein_coding	31	8.55e-07
SURF6	chr9	-	q34.2	136197551	136203047	protein_coding	62	6.98e-09
TBC1D20	chr20	-	p13	416123	443187	protein_coding	23	2.81e-06
TCEB1	chr8	-		74857372	74884522		27	2.61e-06
TENM3	chr4	+	q34.3	183065139	183724177	protein_coding	53	6.16e-08
THRB	chr3	-	p24.2	24158644	24536453	protein_coding	65	5.38e-07
THSD7B	chr2	+	q22.1	137523114	138435287	protein_coding	77	7.84e-07
TIAM2	chr6	+	q25.2	155153830	155578857	protein_coding	29	2.56e-07
TMEM132C	chr12	+	q24.32	128751947	129192460	protein_coding	62	2.18e-08
TMEM132D	chr12	-	q24.33	129556270	130388212	protein_coding	77	1.17e-06
TMPRSS6	chr22	-	q12.3	37461478	37505603	protein_coding	16	1.25e-06
TRIM21	chr11	-	p15.4	4406126	4414926	protein_coding	133	1.56e-06
TSHZ2	chr20	+	q13.2	51588945	52111869	protein_coding	13	2.42e-06
TSPAN11	chr12	+	p11.21	31079361	31149537	protein_coding	15	1.03e-06
UBC	chr12	-	q24.31	125396191	125399587	protein_coding	24	1.03e-06
VRK1	chr14	+	q32.2	97263683	97347951	protein_coding	9	2.13e-06
VSTM1	chr19	-	q13.42	54544079	54567207	protein_coding	14	2.39e-06
WBSCR17	chr7	+		70597522	71178586		117	4.46e-07
WWOX	chr16	+	q23.1	78133326	79246564	protein_coding	177	1.42e-06
ZNF385B	chr2	-	q31.3	180306710	180726232	protein_coding	96	2.35e-08
ZNF385D	chr3	-	p24.3	21462489	22414123	protein_coding	64	1.9e-06
