# Supplementary material for: Insilico Functional Analysis of Genome-Wide Dataset From 17,000 Individuals Identifies Candidate Malaria Resistance Genes Enriched in Malaria Pathogenic Pathways
Source: Front Genet. 2021 Nov 18;12:676960. doi: 10.3389/fgene.2021.676960 (PMC8639191; doi:10.3389/fgene.2021.676960)
Supplement: Supplementary file 8 [file Table1.XLSX]

## Sheet: Sheet1
Column1	Column2	Column5	Column6	Column7	Column8	Column9	Column12	Column13	Column14	Column15	Column17	Column19	Column21	Column22	Column23
Supplementary Data 4. Prioirtized genes from severe malaria resistance GWAS by functional mapping
Genomic locus: The index of genomic risk loci matched with S. Data 1.
posMapSNPs: The number of SNPs mapped to the gene by positional mapping.
posMapMaxCADD: The maximum CADD score of SNPs mapped to the gene by positional mapping.
eqtlMapSNPs: The number of unique SNPs mapped to the gene by eQTL mapping. Note that SNPs can have multiple eQTLs of the same gene in different tissue types but they are counted one time per gene.
eqtlMapminP: The minimum eQTL P-value of mapped SNPs to the gene.
ciMap: "Yes" if the gene is mapped by chroamatin interaction mapping, "No" otherwise
ciMapts: Tissue types of chromatin interactions
ciMapOnly: 1 if the gene is only mapped by chromatin interactions, 0 otherwise
minGWASp: The minimum GWAS P-value of mapped SNPs of the corresponding genes. 'NA' means there was no GWAS tagged SNPs in mapped SNPs.
ensg	symbol	chr	start	end	strand	type	posMapSNPs	posMapMaxCADD	eqtlMapSNPs	eqtlMapminP	eqtlMapts	ciMap	minGwasP	IndSigSNPs	GenomicLocus
ENSG00000142657	PGD	1	10458649	10480201	1	protein_coding	0	0	3	4.62e-07	eQTLGen_trans_eQTLs	No	2.1e-08	rs687621	5
ENSG00000133063	CHIT1	1	203181955	203242769	-1	protein_coding	0	0	0	NA	NA	Yes	3.63e-08	rs4951370	1
ENSG00000159388	BTG2	1	203274619	203278730	1	protein_coding	0	0	0	NA	NA	Yes	3.63e-08	rs4951370	1
ENSG00000122176	FMOD	1	203309756	203320617	-1	protein_coding	0	0	0	NA	NA	Yes	3.63e-08	rs4951370	1
ENSG00000188783	PRELP	1	203444956	203460480	1	protein_coding	0	0	0	NA	NA	Yes	3.63e-08	rs4951370	1
ENSG00000058668	ATP2B4	1	203595689	203713209	1	protein_coding	6	19.13	52	1.15e-13	eQTLGen_cis_eQTLs	Yes	3.49e-08	rs4951370	1
ENSG00000122188	LAX1	1	203734304	203745361	1	protein_coding	0	0	56	5.28e-32	eQTLGen_cis_eQTLs	No	3.49e-08	rs4951370	1
ENSG00000143850	PLEKHA6	1	204187979	204346793	-1	protein_coding	0	0	0	NA	NA	Yes	7.13e-06	rs4951370	1
ENSG00000228474	OST4	2	27293340	27294641	-1	protein_coding	0	0	1	7.78e-06	eQTLGen_trans_eQTLs	No	4.95e-08	rs8176751	5
ENSG00000080345	RIF1	2	152266397	152364527	1	protein_coding	0	0	2	5.41e-06	eQTLGen_trans_eQTLs	No	4.95e-08	rs8176751	5
ENSG00000213186	TRIM59	3	160150233	160203561	-1	protein_coding	0	0	0	NA	NA	Yes	2.05e-08	rs116423146	2
ENSG00000179674	ARL14	3	160394948	160396233	1	protein_coding	1	19.54	0	NA	NA	No	6.34e-07	rs116423146	2
ENSG00000163590	PPM1L	3	160473390	160796695	1	protein_coding	0	0	0	NA	NA	Yes	2.05e-08	rs116423146	2
ENSG00000169255	B3GALNT1	3	160801671	160823172	-1	protein_coding	0	0	0	NA	NA	Yes	2.05e-08	rs116423146	2
ENSG00000169251	NMD3	3	160822484	160971320	1	protein_coding	0	0	0	NA	NA	Yes	2.05e-08	rs116423146	2
ENSG00000196542	SPTSSB	3	161062580	161090668	-1	protein_coding	0	0	0	NA	NA	Yes	2.05e-08	rs116423146	2
ENSG00000170153	RNF150	4	141780961	142134031	-1	protein_coding	0	0	0	NA	NA	Yes	NA	rs111374053	3
ENSG00000109445	ZNF330	4	142142041	142155851	1	protein_coding	0	0	0	NA	NA	Yes	NA	rs111374053	3
ENSG00000109458	GAB1	4	144257915	144395721	1	protein_coding	1	21.8	0	NA	NA	No	NA	rs111374053	3
ENSG00000183090	FREM3	4	144498455	144621828	-1	protein_coding	0	0	1	1.39e-08	PsychENCODE_eQTLs	No	0.0015887	rs201510180	3
ENSG00000197465	GYPE	4	144792020	144826716	-1	protein_coding	0	0	1	1.23e-20	eQTLGen_cis_eQTLs	No	1.68e-08	rs34330779	3
ENSG00000250361	GYPB	4	144917257	145061844	-1	protein_coding	1	12.84	1	0.000211517	PsychENCODE_eQTLs	No	0.0015887	rs201510180	3
ENSG00000113758	DBN1	5	176883609	176901402	-1	protein_coding	0	0	1	4.64e-06	eQTLGen_trans_eQTLs	No	NA	rs687621	5
ENSG00000203813	HIST1H3H	6	27777842	27778314	1	protein_coding	0	0	4	2.24e-06	eQTLGen_trans_eQTLs	No	4.35e-08	rs8176751	5
ENSG00000136193	SCRN1	7	29959719	30029905	-1	protein_coding	0	0	4	2.63e-09	eQTLGen_trans_eQTLs	No	2.1e-08	rs687621	5
ENSG00000160271	RALGDS	9	135973107	136039301	-1	protein_coding	0	0	45	2.74e-07	eQTLGen_cis_eQTLs:BIOSQTL/BIOS_eQTL_geneLevel	No	6.42e-10	rs8176751;rs687621	5
ENSG00000148288	GBGT1	9	136028340	136039332	-1	protein_coding	0	0	32	1.04e-28	eQTLGen_cis_eQTLs:BIOSQTL/BIOS_eQTL_geneLevel	No	2.68e-09	rs687621	5
ENSG00000148296	SURF6	9	136197552	136203235	-1	protein_coding	0	0	48	8.32e-16	eQTLGen_cis_eQTLs:BIOSQTL/BIOS_eQTL_geneLevel:GTEx/v8/Adipose_Visceral_Omentum:GTEx/v8/Whole_Blood:GTEx/v8/Artery_Tibial	No	6.42e-10	rs8176751;rs687621	5
ENSG00000148297	MED22	9	136205160	136214986	-1	protein_coding	0	0	48	5.51e-22	eQTLGen_cis_eQTLs:BIOSQTL/BIOS_eQTL_geneLevel:GTEx/v8/Whole_Blood	No	6.42e-10	rs8176751;rs687621	5
ENSG00000148290	SURF1	9	136218610	136223552	-1	protein_coding	0	0	19	3.35e-16	PsychENCODE_eQTLs:eQTLGen_cis_eQTLs:BIOSQTL/BIOS_eQTL_geneLevel:CMC_SVA_cis:CMC_NoSVA_cis:GTEx/v8/Adipose_Visceral_Omentum	No	6.42e-10	rs8176751;rs687621	5
ENSG00000148291	SURF2	9	136223428	136228045	1	protein_coding	0	0	9	9.82e-07	eQTLGen_cis_eQTLs	No	3.99e-08	rs8176751	5
ENSG00000148248	SURF4	9	136228325	136242970	-1	protein_coding	0	0	17	1.29e-09	eQTLGen_cis_eQTLs	No	6.42e-10	rs8176751	5
ENSG00000148300	REXO4	9	136271186	136283164	-1	protein_coding	0	0	8	1.92e-05	PsychENCODE_eQTLs:CMC_SVA_cis:GTEx/v8/Brain_Nucleus_accumbens_basal_ganglia	No	3.99e-08	rs8176751	5
ENSG00000160323	ADAMTS13	9	136279478	136324508	1	protein_coding	0	0	38	4.21e-06	BIOSQTL/BIOS_eQTL_geneLevel:CMC_SVA_cis:GTEx/v8/Brain_Cerebellum:GTEx/v8/Brain_Nucleus_accumbens_basal_ganglia	No	6.42e-10	rs8176751;rs687621	5
ENSG00000160326	SLC2A6	9	136336217	136344259	-1	protein_coding	0	0	8	NA	CMC_NoSVA_cis	No	1.16e-19	rs8176719;rs687621	5
ENSG00000197859	ADAMTSL2	9	136397286	136440641	1	protein_coding	0	0	17	1.3e-15	eQTLGen_cis_eQTLs	No	6.42e-10	rs8176751	5
ENSG00000132109	TRIM21	11	4406127	4414926	-1	protein_coding	0	0	0	NA	NA	Yes	8.6e-11	rs28576676	6
ENSG00000167333	TRIM68	11	4619902	4629489	-1	protein_coding	0	0	3	2.23e-05	GTEx/v8/Brain_Cerebellum	Yes	8.6e-11	rs10837488;rs4290259:rs113892119:rs28576676	6
ENSG00000167346	MMP26	11	4726157	5013659	1	protein_coding	1	17.12	0	NA	NA	No	3.82e-12	rs141862673;rs145429724	6
ENSG00000176925	OR51F2	11	4842551	4843686	1	protein_coding	1	17.12	0	NA	NA	Yes	3.82e-12	rs141862673;rs145429724;rs113892119:rs28576676	6
ENSG00000176798	OR51L1	11	5020213	5021160	1	protein_coding	0	0	0	NA	NA	Yes	8.6e-11	rs113892119:rs28576676	6
ENSG00000182070	OR52A1	11	5172239	5207612	-1	protein_coding	1	13.75	0	NA	NA	No	0.0006578	rs116780407	6
ENSG00000244734	HBB	11	5246694	5250625	-1	protein_coding	1	13.85	0	NA	NA	No	1.31e-55	rs334	6
ENSG00000223609	HBD	11	5253908	5256600	-1	protein_coding	1	13.85	21	1.86e-55	BIOSQTL/BIOS_eQTL_geneLevel	Yes	1.31e-55	rs334;rs4290259;rs79681613;rs113892119:rs28576676	6
ENSG00000213934	HBG1	11	5269313	5271122	-1	protein_coding	0	0	1	5.66e-06	eQTLGen_cis_eQTLs	No	0.00011774	rs7927066	6
ENSG00000196565	HBG2	11	5274420	5667019	-1	protein_coding	2	14.6	3	9.21e-07	eQTLGen_cis_eQTLs	No	7.28e-24	rs145843585;rs183322782;rs148179286;rs7927066;rs11037724	6
ENSG00000213931	HBE1	11	5289582	5526847	-1	protein_coding	1	14.6	0	NA	NA	No	5.37e-07	rs145843585	6
ENSG00000184881	OR51B2	11	5344541	5345582	-1	protein_coding	1	14.6	0	NA	NA	No	5.37e-07	rs145843585	6
ENSG00000175518	UBQLNL	11	5535623	5537935	-1	protein_coding	0	0	2	4.03e-18	eQTLGen_cis_eQTLs	No	NA	rs11037724	6
ENSG00000121236	TRIM6	11	5617339	5634188	1	protein_coding	0	0	0	NA	NA	Yes	8.6e-11	rs28576676	6
ENSG00000258588	TRIM6-TRIM34	11	5617955	5665628	1	protein_coding	1	13.2	0	NA	NA	Yes	7.28e-24	rs183322782;rs148179286;rs28576676	6
ENSG00000258659	TRIM34	11	5640994	5665628	1	protein_coding	1	13.2	0	NA	NA	No	7.28e-24	rs183322782;rs148179286	6
ENSG00000132274	TRIM22	11	5710919	5758319	1	protein_coding	0	0	0	NA	NA	Yes	8.6e-11	rs28576676	6
ENSG00000110148	CCKBR	11	6280966	6293357	1	protein_coding	0	0	0	NA	NA	Yes	8.6e-11	rs113892119:rs28576676	6
ENSG00000170955	PRKCDBP	11	6340176	6341877	-1	protein_coding	0	0	0	NA	NA	Yes	8.6e-11	rs28576676	6
ENSG00000108960	MMD	17	53469974	53499353	-1	protein_coding	0	0	4	4.04e-07	eQTLGen_trans_eQTLs	No	4.35e-08	rs8176751	5
ENSG00000196628	TCF4	18	52889562	53332018	-1	protein_coding	0	0	1	3.58e-06	eQTLGen_trans_eQTLs	No	NA	rs687621	5
